# Supplementary material
Source: Atypon-hosted journal article supplement (https://dl.acm.org/action/downloadSupplement=3fdoi=3d10.1145/3563657.3596083=26file=3dinterview_guide_submitted.pdf=26download=3dtrue)
Supplement: 3563657.3596083=26file=3dinterview_guide_submitted.pdf=26download=3dtrue [file 3563657.3596083=26file=3dinterview_guide_submitted.pdf=26download=3dtrue]

Aim: The aim of this is to explore how seniors/elders keep records/document/remember/register different things/data in their everyday lives

[Start with the images and also think of asking about the images whose explanations are not clear]

Questions pertinent to images:

1. In this image (showing the image), what types of information do you keep recorded here?
  - a. What prompts you to write down something?
  - b. For how long have you been recording this information?
  - c. Why do you like to organize the information this way?
  - d. Where do you put the stored information?
  - e. How do you use this information?
    - i. Could you please share an example of how you use this information?
      1. What made you look for the stored information?
      2. What was the occasion?
      3. Do you use the recorded data for other usages?
    - ii. Do you face any problems or issues finding and using this information?
      - a. If yes, please explain.
      - b. How do you work around those problems and issues?
    - iii. What did you do to help you look at the **old information**? Do you have any workarounds or hacks to look at the **old data**?

In general questions:

1. What types of tools do you use?
2. Which type of information do you like to record using the tool?
3. Why do you like to use the tool? Do you like any particular aspect or function of that tool? What is it?
4. Do you face any problems or issues with using that tool?
  - a. If yes, what types of problems do you face?
  - b. How do you work around those problems?
5. How do you decide what information to be stored in which format?
  - a. What are the things that influence your choice?
6. In your opinion, if you have magic power or a super tool to help you keep records of this information, what would be like?
